# Supplementary material for: Chemical stimulus-responsive supramolecular hydrogel formation and shrinkage of a hydrazone-containing short peptide derivative
Source: Royal Society of Chemistry journal article supplement (doi:10.1039/c9sm01969c), 2019-12-04
Supplement: c9sm01969c2.pdf [file c9sm01969c2.pdf]

*Supplementary Information*

---

**Chemical Stimulus-Responsive Supramolecular Hydrogel Formation  
and Shrinkage of a Hydrazone-containing Short Peptide Derivative**

Takumi Sugiura,<sup>a</sup> Takurou Kanada,<sup>a</sup> Daisuke Mori,<sup>a</sup> Hiroyuki Sakai,<sup>a</sup>  
Aya Shibata,<sup>a</sup> Yoshiaki Kitamura,<sup>a</sup> and Masato Ikeda<sup>\*abcd</sup>

<sup>a</sup> *Department of Life Science and Chemistry, Graduate School of Natural Science and Technology, Gifu University, 1-1  
Yanagido, Gifu 501-1193, Japan*

*Tel: +81-58-293-2639, E-mail: m\_ikeda@gifu-u.ac.jp*

<sup>b</sup> *United Graduate School of Drug Discovery and Medical Information Sciences, Gifu University, 1-1 Yanagido, Gifu  
501-1193, Japan*

<sup>c</sup> *Center for Highly Advanced Integration of Nano and Life Sciences, Gifu University (G-CHAIN), 1-1 Yanagido,  
Gifu 501-1193, Japan*

<sup>d</sup> *Institute of Nano-Life-Systems, Institute of Innovation for Future Society, Nagoya University, Furo-cho, Chikusa-ku,  
Nagoya, 464-8601, Japan*

---

**Contents:**

- 1. Experimental**
- 2. Synthesis**
- 3. Characterization of compounds**
- 4. Characterization of supramolecular hydrogels**

## 1. Experimental

**Generals** Unless stated otherwise, all commercial reagents were used as received. All water used in the experiments refers to ultra-pure water obtained from a Millipore system having a specific resistance of 18 M $\Omega$ •cm. Thin layer chromatography (TLC) was performed on silica gel 60F<sub>254</sub> (Merck). Column chromatography was performed on silica gel PSQ-100B (Fuji Silysia Chemical, 100  $\mu$ m) or DispoPackAT ODS (YMC, 50  $\mu$ m). Reverse phase HPLC (RP-HPLC) was conducted with a Shimadzu Prominence instrument LC-20AT and SPD-20A equipped with a YMC Triart C18 column (150 mm  $\times$  4.6 mm I. D., 5  $\mu$ m). <sup>1</sup>H and <sup>13</sup>C NMR spectra were obtained on a JEOL JNM ECS-400 spectrometer (400 MHz for <sup>1</sup>H, 100 MHz for <sup>13</sup>C) with tetramethylsilane (TMS) or residual non-deuterated solvents (internal 1,4-dioxane for D<sub>2</sub>O) as the internal references. Multiplicities are abbreviated as follows: s = singlet, d = doublet, t = triplet, q = quartet, m = multiplet, dd = double doublet, br = broad. MALDI-TOF mass spectra were recorded using a Shimadzu AXIMA-CFR plus mass spectrometer. Other mass spectrometry was performed on a JEOL JMS-T100LP AccuTOF LC-plus (ESI and DART) or a Waters Xevo QToF (ESI) mass spectrometer.

**Conventional hydrogelation ability test:** Gelation ability was evaluated by an inverted tube test. Typically, DMSO stock solution of **Z-F<sub>2</sub>-BPS<sub>n</sub>** (5.0 wt%, 4.0  $\mu$ L) was mixed with aqueous buffer (196  $\mu$ L, 50 mM MES-NaOH (pH 7.0 and 5.5)) to obtain an aqueous dispersion (0.10 wt%, 1.2 mM, the final DMSO concentration was kept constant at 2% for the other concentrations of **Z-F<sub>2</sub>-BPS<sub>n</sub>** (0.20, 0.40, 1.0 wt%)) in a glass vial. The resultant solution was applied with sonication and heated by a heat gun. When a transparent aqueous solution was obtained, the solution was cooled down at room temperature for designated time and the hydrogel formation was evaluated by inverting the glass vial.

**Hydroxylamine-induced hydrogel formation and HPLC analysis:** Typically, to an aqueous solution (100  $\mu$ L) of **Z-F<sub>2</sub>-BPS<sub>2</sub>** (0.10 wt%, 1.2 mM) prepared according to the procedure described above was added an aqueous solution of hydroxylamine (300 mM hydroxylamine•HCl in water, 4.0  $\mu$ L) and the resultant solution was incubated at room temperature. After designated time, acetonitrile (100  $\mu$ L) and a DMSO stock solution of **Z-F-OH** (50 mM, 4.5  $\mu$ L, internal stand) was added to dissolve the hydrogel for HPLC analysis. An aliquot (10  $\mu$ L) of the obtained solution was subjected to RP-HPLC analysis (YMC Triart C18 column (150 mm  $\times$  4.6 mm I. D., 5  $\mu$ m), Wavelength of detection: 260 nm, Eluent: **A:B** = 80:20 to 40:60 (**A**: Acetonitrile, **B**: H<sub>2</sub>O/0.1%TEA), linear gradient over 30 min, flow rate = 1.0 mL/min). Internal standard (**Z-F-OH**) was used to estimate the concentrations of **Z-F<sub>2</sub>-BPS<sub>2</sub>** and **Z-F<sub>2</sub>-NHNH<sub>2</sub>**.

**TEM observation:** Sample (ca. 10  $\mu\text{L}$ ) was dropped on a copper TEM grid covered by an elastic carbon-support film (20–25 nm) with a filter paper underneath and the excess solution was blotted with the filter paper immediately. The TEM grid was dried under a reduced pressure for at least 6 h prior to TEM observation. TEM images were acquired using a JEOL JEM-1025 (accelerating voltage: 100 kV) equipped with a CCD camera and analyzed with ImageJ on a Windows PC.

**CLSM observation:** A freshly prepared homogeneous solution (0.10 wt%, 50 mM MES-NaOH (pH 5.5, 200  $\mu\text{L}$ ) of **Z-F<sub>2</sub>-BPS<sub>2</sub>** obtained according to the procedure described above was mixed with a DMSO solution of Nile-blue (5 mM (final concentration is 25  $\mu\text{M}$ ), 1.0  $\mu\text{L}$ ) and aniline (2.2  $\mu\text{L}$ ). The solution was left to cool down at room temperature. The solution (20  $\mu\text{L}$ ) was spotted on a glass coverslip (diameter: 25 mm, thickness: 0.13–0.17 mm, Fisher Scientific) placed in an Attofluor cell chamber (Thermo Fisher Scientific) with water drops (50  $\mu\text{L}$ ) around the sample drop to avoid dryness. The sample before and after the addition of hydroxylamine (300 mM, 0.8  $\mu\text{L}$ , 10 eq.) was subjected to observations using an inverted confocal laser scanning microscope (FV1000-D, Olympus) equipped with an Ar laser (488 nm) and LED laser (559 nm) and a Gallium Arsenide Phosphide (GaAsP) detector. A 60 $\times$  (numerical aperture (NA) = 1.49) oil objective was employed to obtain images. The images were obtained and analyzed by the acquisition software FV10-ASW4.2 equipped with the microscope.

**Circular dichroism:** CD spectra (with HT voltage data) were recorded in a 0.1-mm quartz cell unless otherwise noted on a Jasco J-820 spectropolarimeter equipped with a programmable temperature-control unit (Julabo HP-4). The spectra were obtained by using a 2-nm slit width and a scanning step of 0.1 nm from 300 to 210 nm. Each spectrum was an average of 4 scans with the buffer background subtracted.

**Rheological measurement:** Dynamic frequency and strain sweep experiments were carried out on a TA instruments AR-G2 rheometer using a 20-mm stainless steel parallel plate (The temperature of the plate was controlled at 25  $^{\circ}\text{C}$  by peltier system) at the gap of 1000  $\mu\text{m}$ . Hydrogel samples were placed on the plate. All the gels showed almost linear viscoelastic regime up to 1.0% strain (frequency: 1.0 rad/s). Therefore, frequency sweep (0.1–100 rad/s) was performed under 0.2 % strain.

**DLS measurements:** DLS measurements were performed on a Malvern Zetasizer Nano equipped with a He-Ne laser (633 nm) and a detection angle of 173 $^{\circ}$ . Aqueous solutions were filtered using a Millipore

membrane filter (0.45  $\mu\text{m}$  pore size) before measurements. The particle size distribution was derived from a deconvolution of the measured intensity autocorrelation function of the sample by the “General Purpose Mode” (non-negative least-squares) algorithm included in the DTS software.

## 2. Synthesis

### 2.1. Synthesis of water-soluble aldehyde derivatives (**BPS<sub>n</sub>**) bearing propylsulfonate anions

Compound **2** (**BPS**)<sup>[S1]</sup> was synthesized according to the slightly modified method reported previously.

Compound **4** (**BPS<sub>2</sub>**) was synthesized according to the similar method (**Scheme S1**).

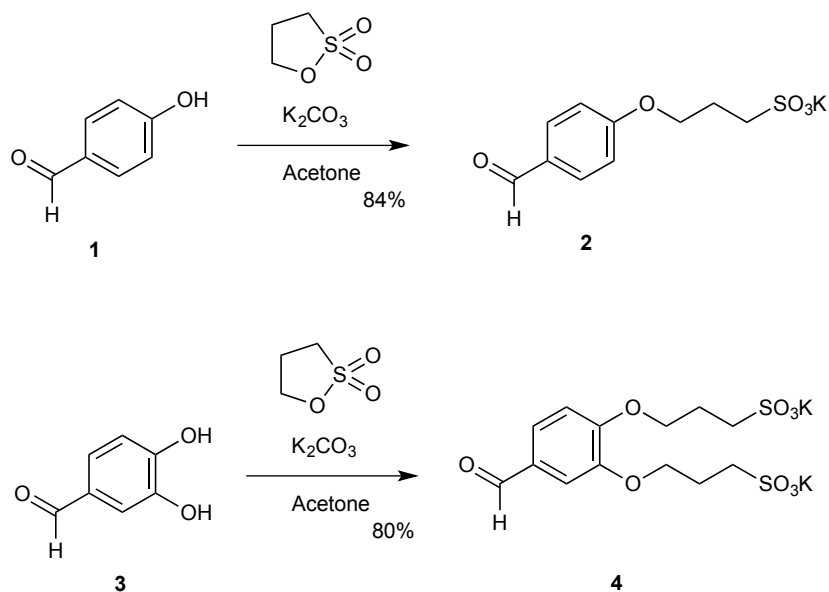

**Scheme S1.** Synthesis of anionic aldehyde derivatives (**2** (**BPS**) and **4** (**BPS<sub>2</sub>**)).

**Synthesis of compound 2**<sup>[S1]</sup>: To a mixture of 4-hydroxybenzaldehyde (**1**) (123 mg, 1.0 mmol), K<sub>2</sub>CO<sub>3</sub> (205 mg, 1.5 mmol), and acetone (5 mL) was added 1,3-propanesultone (125 mg, 1.0 mmol) and the resultant mixture was stirred at 40 °C for 5 h. After the mixture was cooled, 5% aqueous HCl was added to neutralize and precipitate was removed by filtration. The filtrate was concentrated to dryness and the residue was purified by column chromatography (SiO<sub>2</sub>, chloroform: methanol = 2:1) to afford compound **2** (**BPS**)<sup>[S1]</sup> (206 mg, 84%) as a white solid: <sup>1</sup>H NMR (400 MHz, DMSO-*d*<sub>6</sub>)  $\delta$  (ppm) 2.02 (quin, 2H), 2.51–2.60 (m, 2H), 4.19 (t, *J* = 6.6 Hz, 2H), 7.11 (d, *J* = 8.7 Hz, 2H), 7.85 (d, *J* = 8.5 Hz, 2H), 9.86 (s, 1H); <sup>13</sup>C NMR (100 MHz, DMSO-*d*<sub>6</sub>)  $\delta$  (ppm) 25.09, 47.68, 67.26, 114.94, 129.50, 131.86, 163.69, 191.339.

**Synthesis of compound 4**: To a mixture of 3,4-dihydroxybenzaldehyde (**3**) (61 mg, 0.5 mmol), K<sub>2</sub>CO<sub>3</sub> (912 mg, 6.0 mmol), and acetone (10 mL) was added 1,3-propanesultone (484 mg, 4.0 mmol) and the resultant mixture was refluxed for 3 days. After the mixture was cooled, precipitate was removed by filtration. The filtrate was concentrated to dryness and the residue was purified by re-precipitation with

H<sub>2</sub>O/acetone to afford compound **4** (**BPS**<sub>2</sub>) (151 mg, 80%) as a yellow solid: <sup>1</sup>H NMR (400 MHz, DMSO-*d*<sub>6</sub>) δ (ppm) 1.91–2.14 (m, 4H), 2.52–2.61 (m, 4H), 4.13 (t, *J* = 6.6 Hz, 2H), 4.21 (t, *J* = 6.8 Hz, 2H), 7.16 (d, *J* = 8.2 Hz, 1H), 7.37 (d, *J* = 1.8 Hz, 1H), 7.51 (dd, *J* = 8.2, 1.8 Hz, 1H), 9.81 (s, 1H); <sup>13</sup>C NMR (100 MHz, DMSO-*d*<sub>6</sub>) δ (ppm) 25.06, 38.16, 25.21, 47.66, 47.84, 67.57, 67.63, 111.32, 125.79, 129.44, 148.58, 153.88, 191.38; HRMS (ESI, negative): Calcd. for [M(C<sub>13</sub>H<sub>16</sub>K<sub>2</sub>O<sub>9</sub>S<sub>2</sub>) – 2 K]<sup>2-</sup>: *m/z* = 190.0118; Found: 190.0104.

## 2.2. Synthesis of precursors (**Z-F<sub>2</sub>-BPS** and **Z-F<sub>2</sub>-BPS<sub>2</sub>**)

Precursors (**Z-F<sub>2</sub>-BPS** and **Z-F<sub>2</sub>-BPS<sub>2</sub>**) were synthesized from **Z-F<sub>2</sub>-NHNH<sub>2</sub>**<sup>[S2]</sup> as shown in Scheme S2.

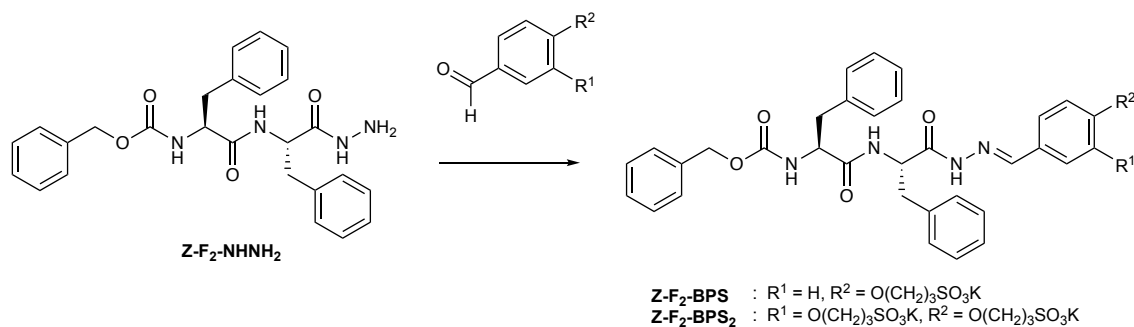

**Scheme S2.** Synthesis of precursors **Z-F<sub>2</sub>-BPS** and **Z-F<sub>2</sub>-BPS<sub>2</sub>**.

**Synthesis of Z-F<sub>2</sub>-BPS<sub>2</sub>:** To a solution of **Z-F<sub>2</sub>-NHNH<sub>2</sub>** (48 mg, 0.10 mmol) in ethanol (8 mL), H<sub>2</sub>O (2 mL), and TFA (0.15 mL) was added compound **4**(**BPS**<sub>2</sub>) (39 mg, 0.10 mmol). The resultant mixture was stirred at 40 °C under Ar atmosphere for 2 days. After the mixture was cooled and concentrated, diethyl ether (50 mL) was added and the precipitate was collected by filtration, washed with diethyl ether, and dried to yield **Z-F<sub>2</sub>-BPS<sub>2</sub>** (37 mg, 45%) as a pale yellow solid: <sup>1</sup>H NMR (400 MHz, DMSO-*d*<sub>6</sub>, assigned as the mixture of two amide rotamers (**Fig. S6,S7**), 25 °C) δ (ppm) 1.92–2.15 (m, 4H), 2.55–2.75 (m, 4H (overlapped with DMSO)), 2.80–3.20 (m, 4H), 3.94–4.18 (m, 4H), 4.20–4.35 (m, 1H), 4.50–4.68 (m, 0.5H), 4.92 (m, 2H), 5.28–5.48 (m, 0.5H), 7.01 (dd, *J* = 8.2, 4.1 Hz, 1H), 7.09–7.39 (m, 17H), 7.45 (d, *J* = 9.4 Hz, 1H), 8.00 (s, 0.5H), 8.06 (s, 0.5H), 8.27 (d, *J* = 7.8 Hz, 0.5H), 8.38 (d, *J* = 7.8 Hz, 0.5H), 11.32 (s, 0.5H), 11.44 (s, 0.5H); <sup>13</sup>C NMR (100 MHz, DMSO-*d*<sub>6</sub>) δ (ppm) 25.24, 25.40, 47.88, 47.97, 48.05, 56.08, 65.17, 65.20, 67.47, 67.51, 67.55, 67.63, 126.20, 126.22, 126.42, 126.71, 126.75, 127.39, 127.42, 127.66, 128.00, 128.03, 128.18, 128.19, 128.29, 128.32, 129.06, 129.18, 129.22, 129.27, 137.00, 137.02, 137.38, 137.84, 137.99, 138.15, 148.59, 148.63, 150.23, 150.40, 155.71, 155.72, 167.13, 171.49, 172.05; HRMS (ESI, negative): Calcd. for [M(C<sub>39</sub>H<sub>42</sub>N<sub>4</sub>O<sub>12</sub>S<sub>2</sub>K<sub>2</sub>) – 2K + H]<sup>-</sup>: *m/z* = 823.2319;

Found: 823.2338.

**Synthesis of Z-F<sub>2</sub>-BPS:** The titled compound was prepared from **Z-F<sub>2</sub>-NHNH<sub>2</sub>** (23 mg, 50 μmol) and compound **2(BPS)** (14 mg, 50 μmol) in the similar way for **Z-F<sub>2</sub>-BPS** and was obtained in 84% yield (29 mg) as a white solid: <sup>1</sup>H NMR (400 MHz, DMSO-*d*<sub>6</sub>, assigned as the mixture of two amide rotamers, 25 °C) δ (ppm) 1.93–2.09 (m, 2H), 2.52–2.59 (m, 2H (overlapped with DMSO)), 2.62–3.14 (m, 4H), 4.05–4.16 (m, 2H), 4.21–4.35 (m, 1H), 4.52–4.66 (m, 0.5H), 4.93 (m, 2H), 5.34–5.47 (m, 0.5H), 6.99 (m, 1H), 7.14–7.37 (m, 15H), 7.46 (d, *J* = 8.5 Hz, 2H), 7.60 (d, *J* = 8.2 Hz, 2H), 7.92 (s, 0.5H), 8.09 (s, 0.5H), 8.23 (d, *J* = 7.8 Hz, 0.5H), 8.36 (d, *J* = 7.8 Hz, 0.5H), 11.33 (s, 0.5H), 11.42 (s, 0.5H); <sup>13</sup>C NMR (100 MHz, DMSO-*d*<sub>6</sub>) δ (ppm) 25.11, 25.24, 47.69, 47.85, 51.88, 53.66, 56.11, 65.19, 66.91, 67.27, 114.80, 114.85, 114.95, 126.24, 126.26, 126.41, 126.46, 126.49, 126.61, 127.68, 128.04, 128.17, 128.31, 128.42, 128.73, 129.12, 129.21, 129.26, 131.85, 137.00, 137.01, 137.03, 137.37, 137.68, 137.98, 138.12, 155.73, 160.16, 160.32, 167.14, 171.35, 171.46, 171.76, 171.81, 171.98, 191.32; HRMS (ESI, positive): Calcd. for [M(C<sub>36</sub>H<sub>37</sub>N<sub>4</sub>O<sub>8</sub>SK) – K]<sup>+</sup>: *m/z* = 685.2332; Found: 685.2355.

### 3. Characterization of compounds

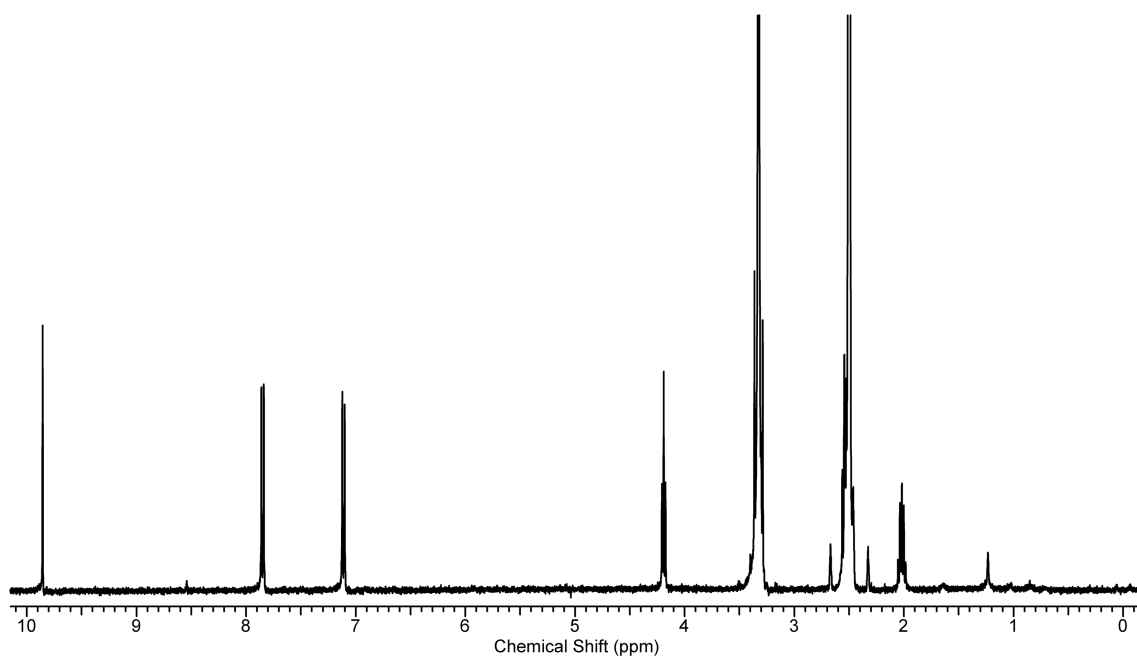

**Fig. S1.**  $^1\text{H}$  NMR spectrum (400 MHz,  $\text{DMSO-}d_6$ ) of **BPS**.

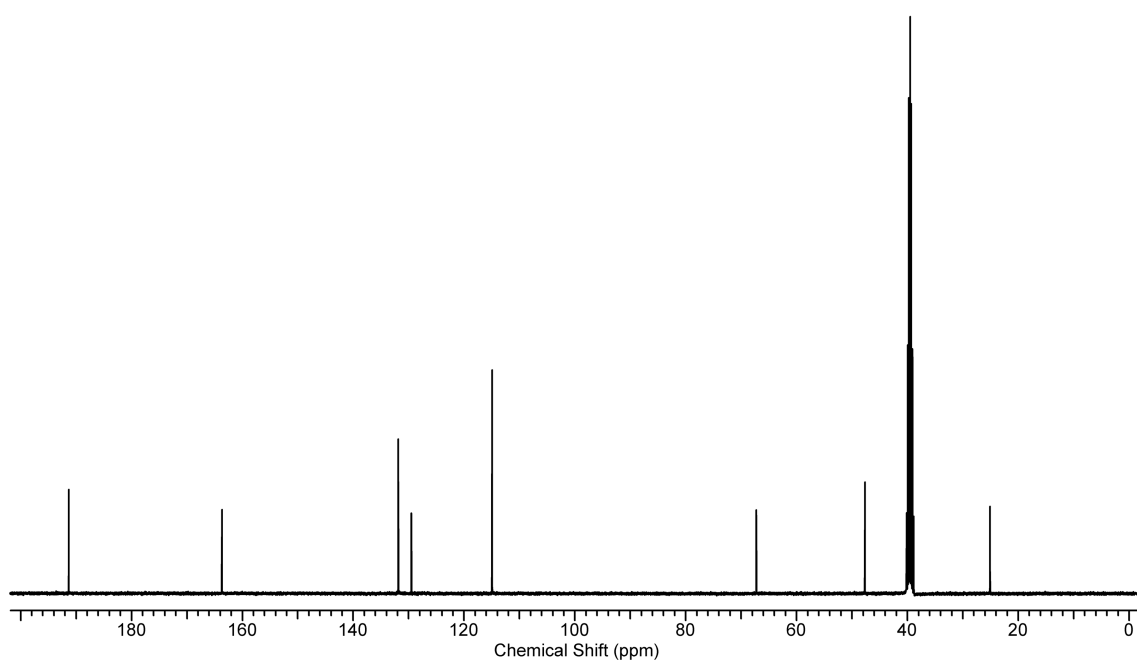

**Fig. S2.**  $^{13}\text{C}$  NMR spectrum (100 MHz,  $\text{DMSO-}d_6$ ) of **BPS**.



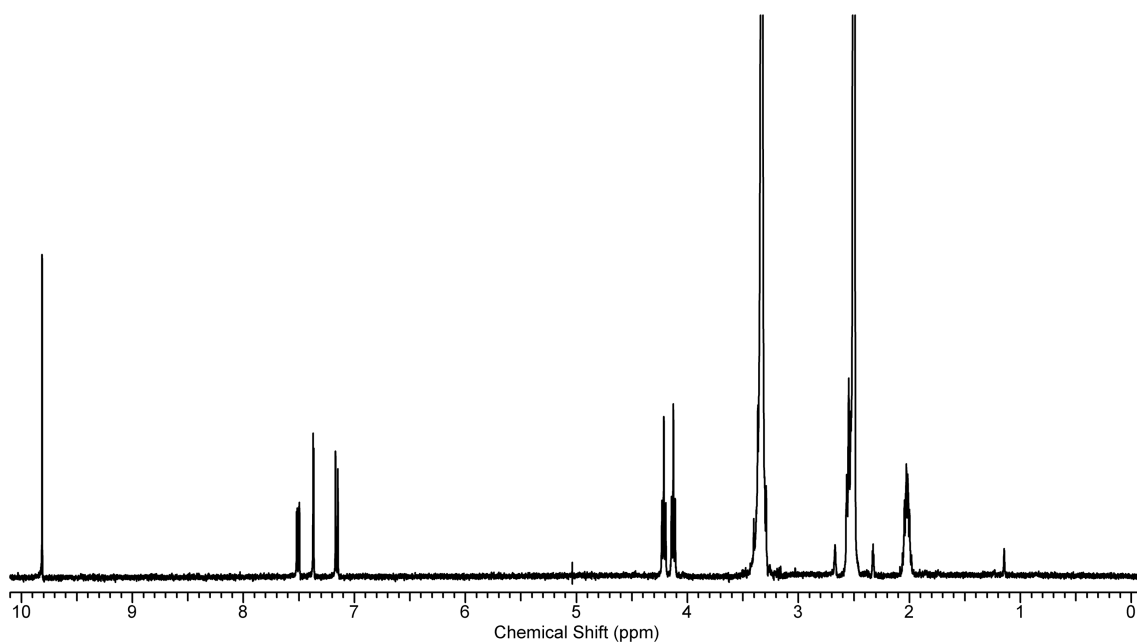

**Fig. S3.**  $^1\text{H}$  NMR spectrum (400 MHz,  $\text{DMSO-}d_6$ ) of **BPS<sub>2</sub>**.

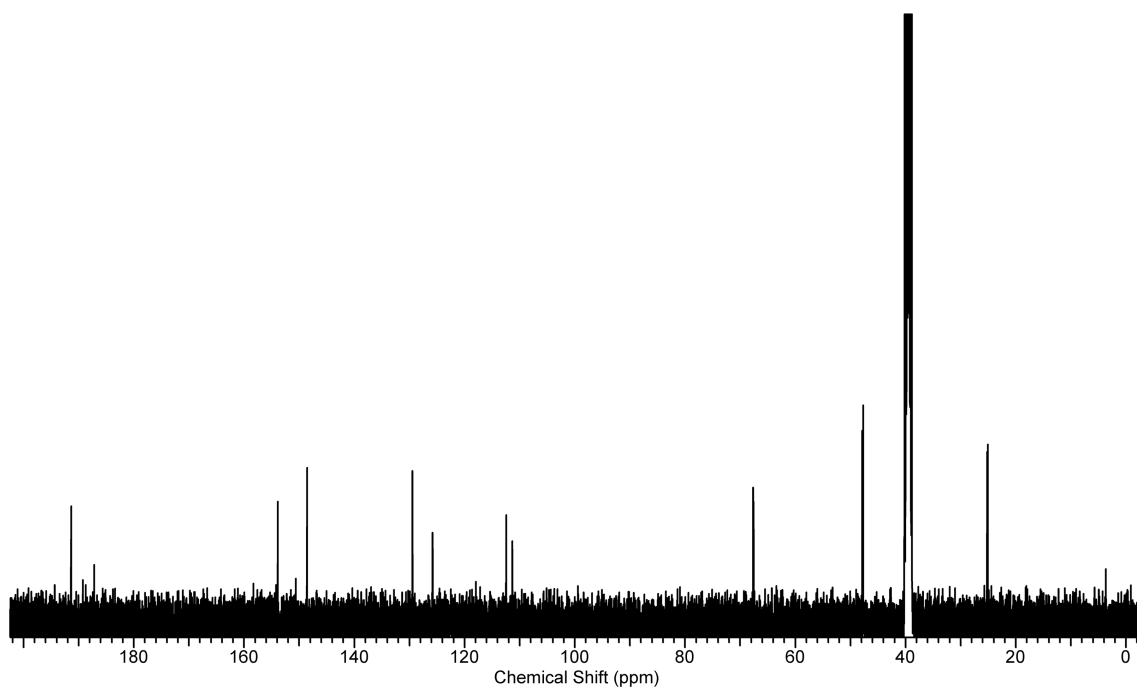

**Fig. S4.**  $^{13}\text{C}$  NMR spectrum (100 MHz,  $\text{DMSO-}d_6$ ) of **BPS<sub>2</sub>**.

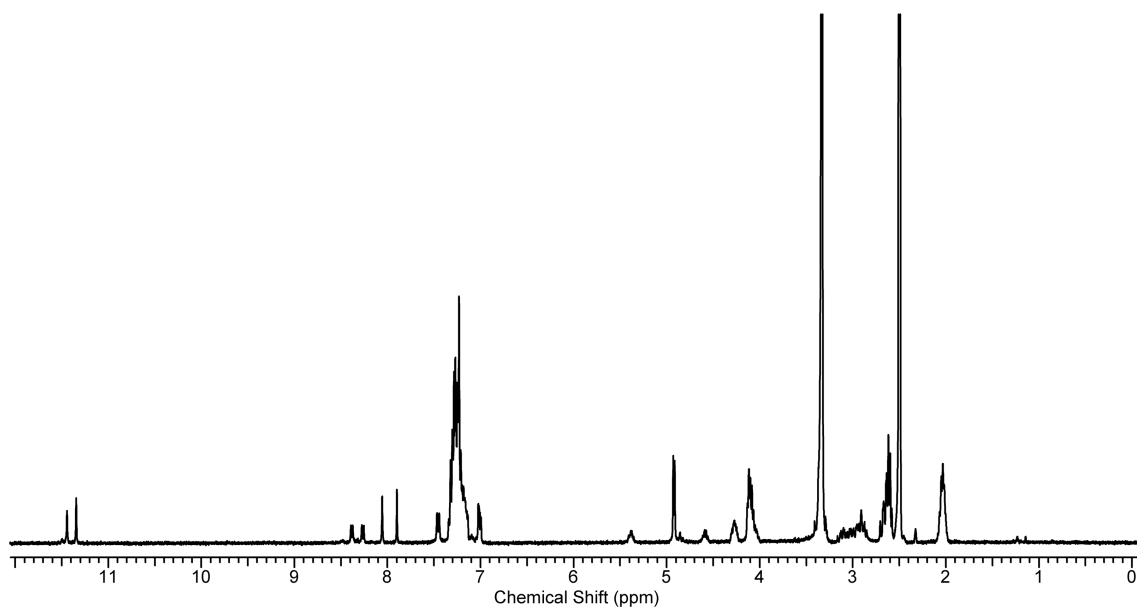

**Fig. S5.**  $^1\text{H}$  NMR spectrum (400 MHz,  $\text{DMSO-}d_6$ ) of **Z-F<sub>2</sub>-BPS<sub>2</sub>**.

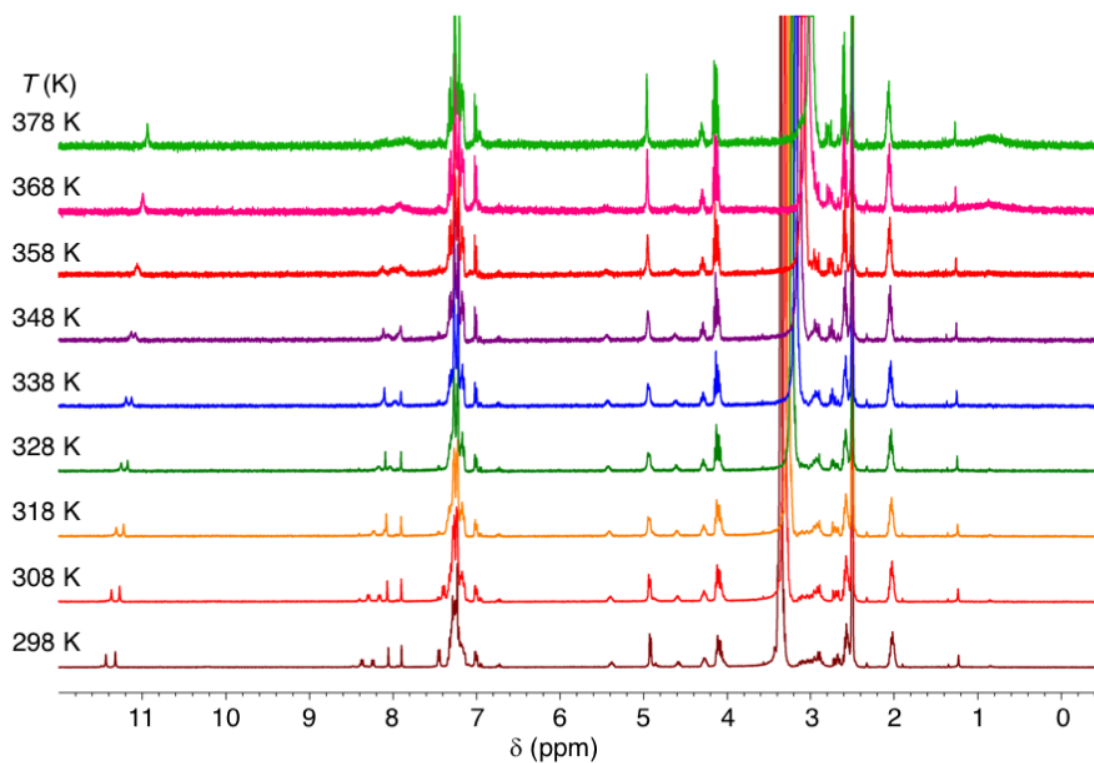

**Fig. S6.** Variable-temperature (VT)  $^1\text{H}$  NMR spectra (400 MHz,  $\text{DMSO-}d_6$ , 1 mM) of **Z-F<sub>2</sub>-BPS<sub>2</sub>**.

Duplication of signals was observed especially in the low-field region, indicating that the exchange between the two amide rotamers (*anti* and *syn*, see **Fig. S7A** for the chemical structures) is slow on NMR time scale, according to previous reports for similar compounds.<sup>[S3]</sup> Variable-temperature (VT)  $^1\text{H}$  NMR

measurements allow for the estimation of the free-energy barrier for the amide-bond rotation. From the coalescence temperature ( $T_C$ ) and Gutowsky equation (equation (2)),  $\Delta G^\ddagger$  and  $k$  value was evaluated on the basis of

$$k = \pi\Delta\nu / 2^{1/2} \quad (1)$$

$$\Delta G^\ddagger = RT_C \ln[2^{1/2}k_B T_C / \pi b(\Delta\nu)] \quad (2)$$

where  $\Delta\nu$  is difference in the chemical shifts (Hz). From **Fig. S6** (from a set of signals assignable to  $\text{NH}$  {“ $a_a$  for *anti* and  $a_s$  for *syn*”} as shown in **Fig. S7A**),  $T_C$  was estimated to be 85 °C (358 K), then,  $\Delta G^\ddagger$  and  $k$  was evaluated to be 74.5 kJ mol<sup>-1</sup> and 101 s<sup>-1</sup>, respectively, according to the equations (1) and (2). These values are well comparable to the similar compounds.<sup>[S3]</sup> In addition, this result indicates that the two rotamers can be exchanged rapidly at ambient temperature, which is consistent with the fact that a single peak was observed in the HPLC analysis of **Z-F<sub>2</sub>-BPS<sub>2</sub>** (**Fig. 4**).

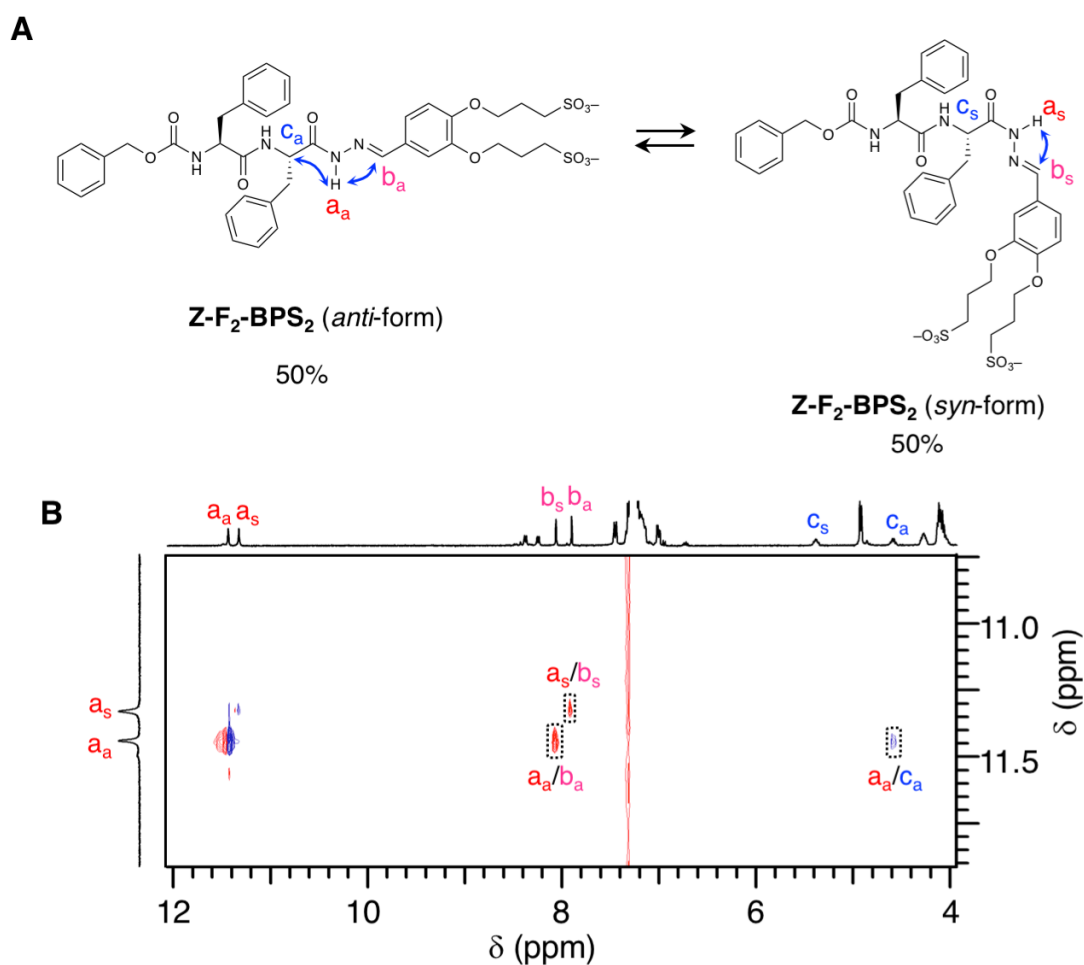

**Fig. S7.** (A) Proposed exchange between the two amide rotamers of **Z-F<sub>2</sub>-BPS<sub>2</sub>**. The blue arrows indicate the assignments of the observed NOE correlations ( $a_a/b_a$ ,  $a_a/b_a$ , and  $a_s/b_s$ , shown in panel (B)).

Each composition (%) at room temperature estimated from the  $^1\text{H}$  NMR spectrum is shown. **(B)** Partial NOESY spectrum (400 MHz,  $\text{DMSO-}d_6$ , 25  $^\circ\text{C}$ , 2 mM, mixing time = 500 ms) of **Z-F<sub>2</sub>-BPS<sub>2</sub>**.

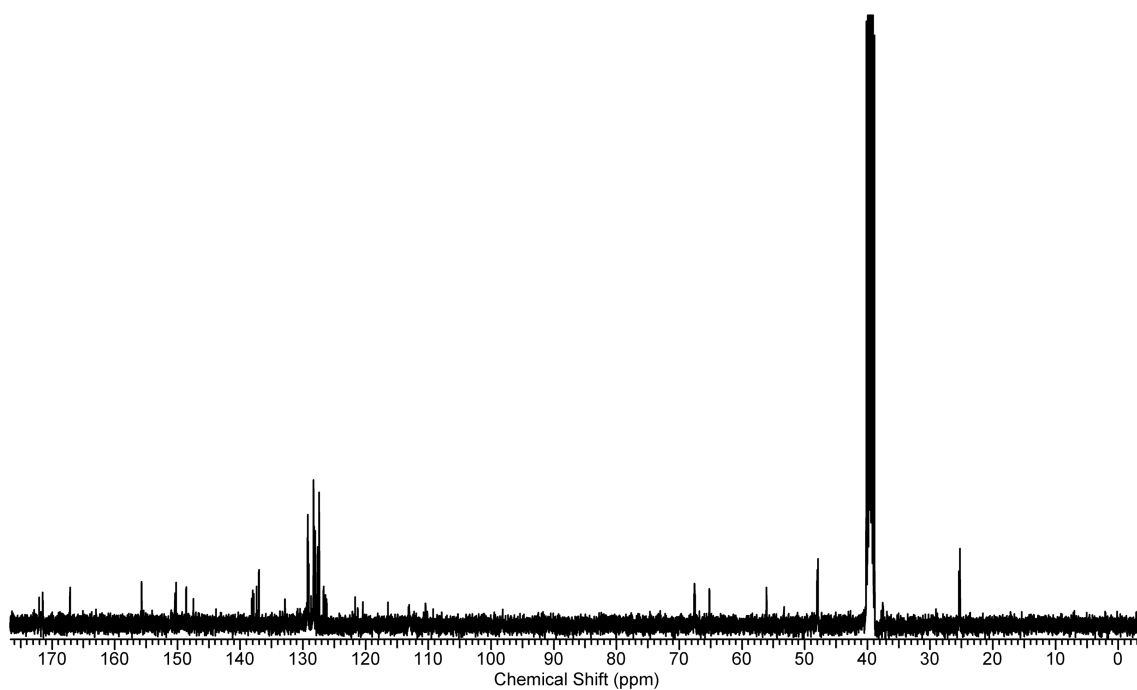

**Fig. S8.**  $^{13}\text{C}$  NMR spectrum (100 MHz,  $\text{DMSO-}d_6$ ) of **Z-F<sub>2</sub>-BPS<sub>2</sub>**.

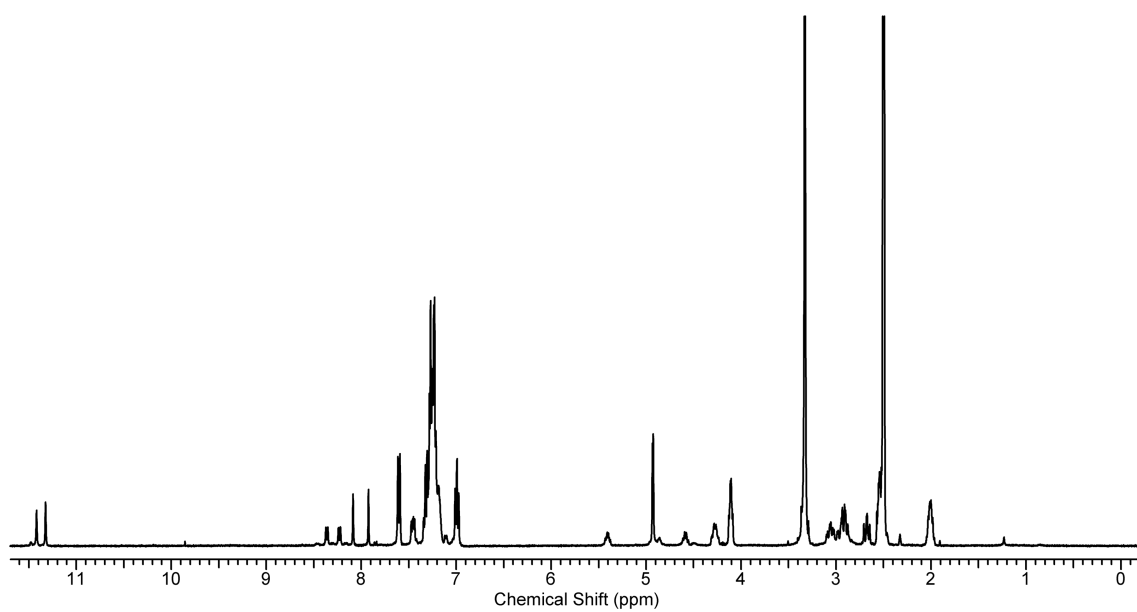

**Fig. S9.**  $^1\text{H}$  NMR spectrum (400 MHz,  $\text{DMSO-}d_6$ ) of **Z-F<sub>2</sub>-BPS**.

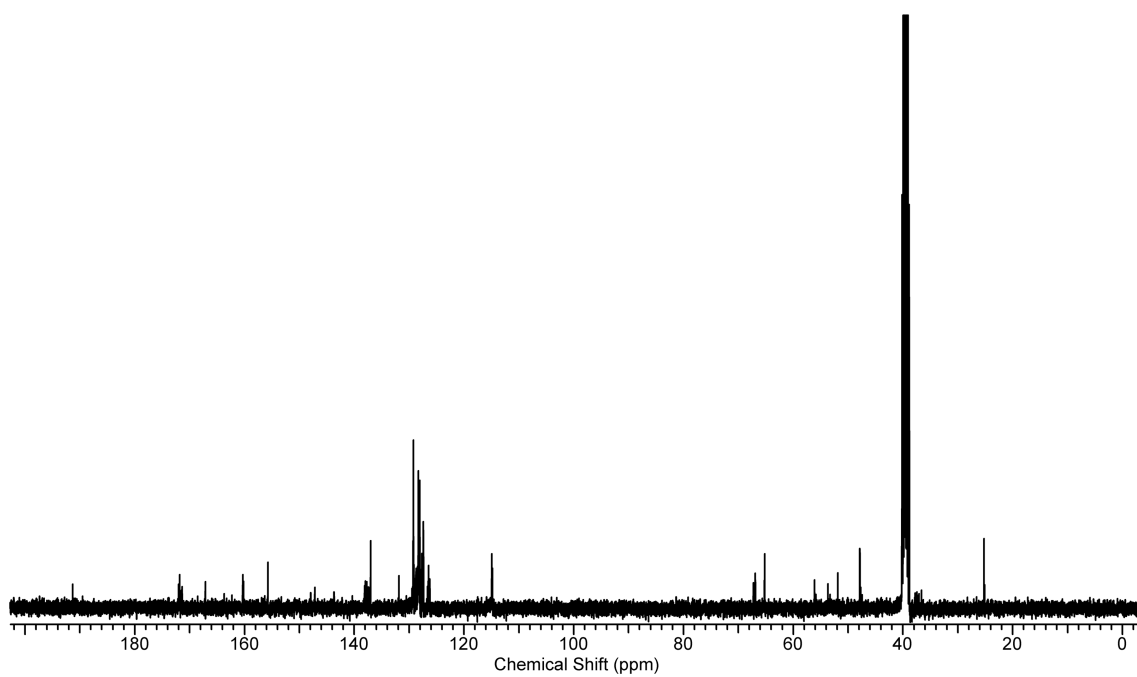

**Fig. S10.**  $^{13}\text{C}$  NMR spectrum (100 MHz,  $\text{DMSO-}d_6$ ) of **Z-F<sub>2</sub>-BPS**.

#### 4. Characterization of supramolecular hydrogels

##### ■Gelation ability of Z-F<sub>2</sub>-BPS<sub>n</sub> (n = 1, 2)

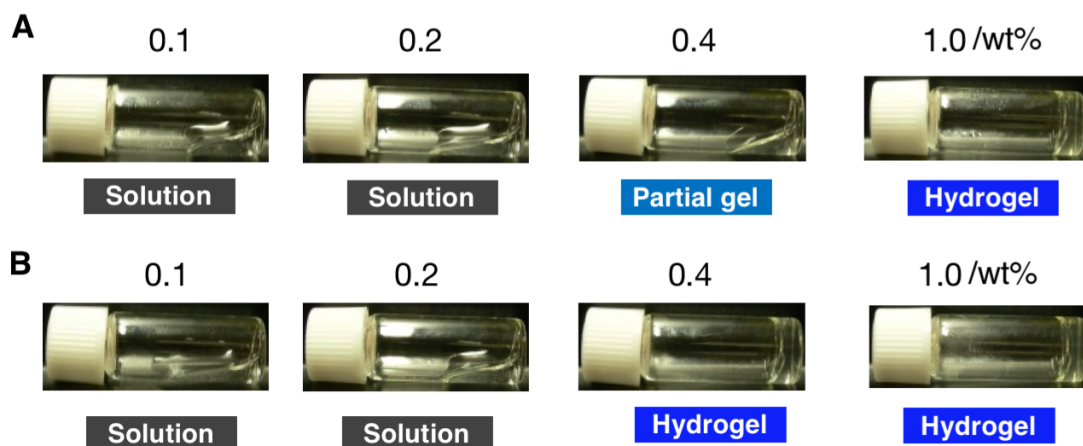

**Fig. S11.** Photographs showing gelation ability of Z-F<sub>2</sub>-BPS<sub>2</sub> (tube-inversion experiments [Insoluble: Insoluble residue remained even after heating, Hydrogel: No flow was observed when inverting the vial, Partial gel: weak partial gel (Flow was observed when inverting the vial while part of the solution was gelled), Solution: solution or clear dispersion]) dependent on the concentration (**A**: 50 mM MES-NaOH (pH 7.0) containing DMSO (2.0 vol%), **B**: 50 mM MES-NaOH (pH 5.5) containing DMSO (2.0 vol%)).

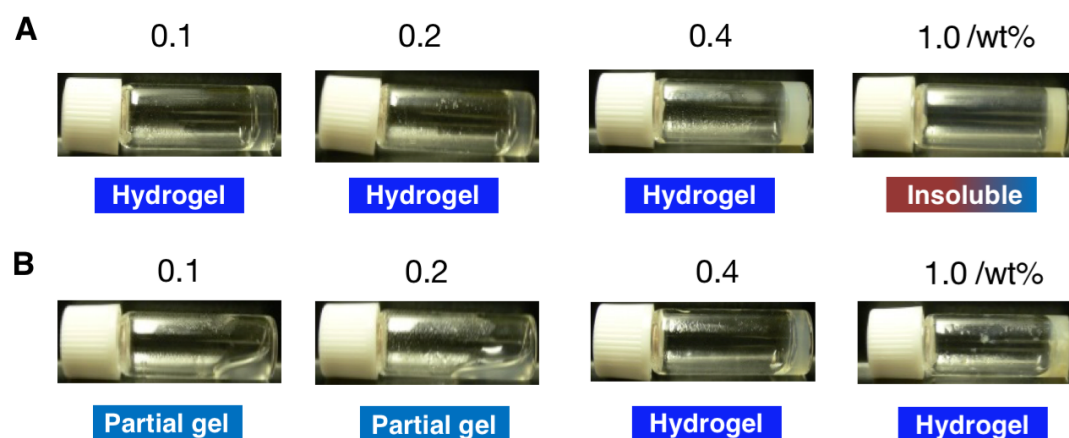

**Fig. S12.** Photographs showing gelation ability of Z-F<sub>2</sub>-BPS (tube-inversion experiments [Insoluble: Insoluble residue remained even after heating, Hydrogel: No flow was observed when inverting the vial, Partial gel: weak partial gel (Flow was observed when inverting the vial while part of the solution was gelled), Solution: solution or clear dispersion]) dependent on the concentration (**A**: 50 mM MES-NaOH (pH 7.0) containing DMSO (2.0 vol%), **B**: 50 mM MES-NaOH (pH 5.5) containing DMSO (2.0 vol%)).

■ Rheological property of the hydrogels

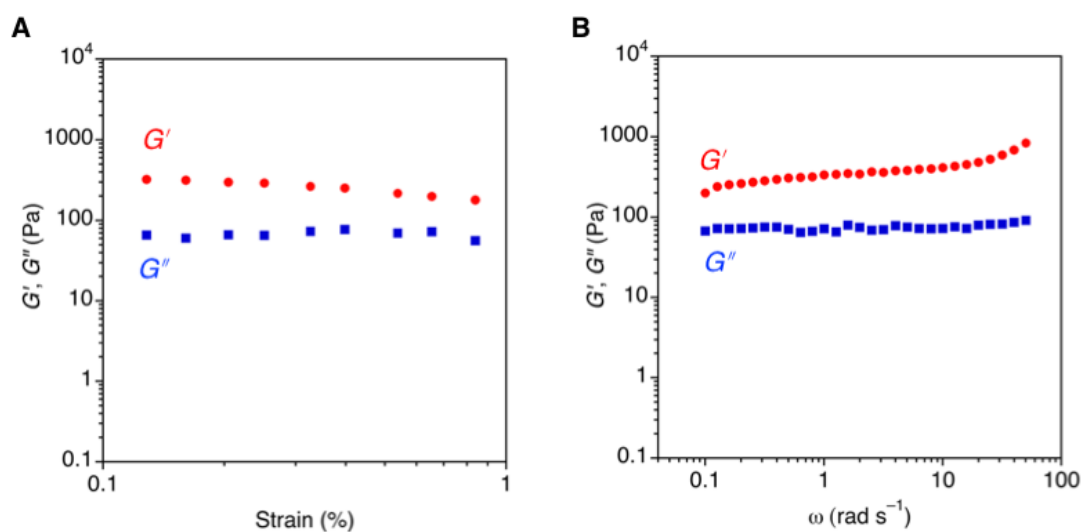

**Fig. S13.** (A) Strain sweep (1.0 rad/s) and (B) frequency sweep (0.2% strain) rheological properties of the hydrogel prepared from **Z-F<sub>2</sub>-BPS<sub>2</sub>** at 4.5 h after the addition of hydroxylamine ( $G'$ : storage shear modulus,  $G''$ : loss shear modulus). *Conditions:* **Z-F<sub>2</sub>-BPS<sub>2</sub>** (0.10 wt%, 1.2 mM), 50 mM MES-NaOH (pH 5.5) containing DMSO (2.0 vol%),  $[\text{NH}_2\text{OH}] = 40$  eq.

■CD spectral change (with HT voltage data) of Z-F<sub>2</sub>-BPS<sub>2</sub>

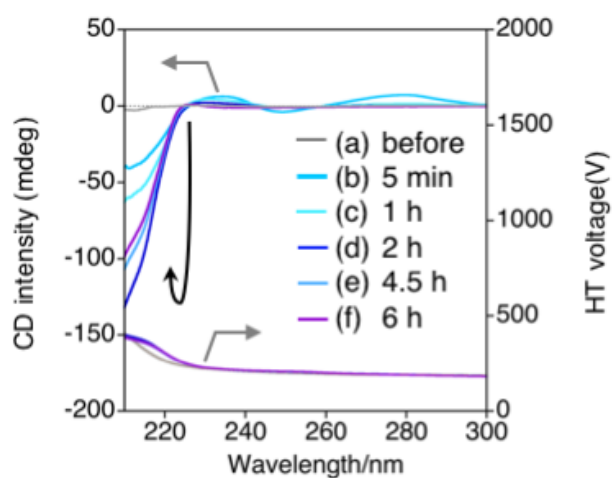

**Fig. S14.** (A) CD spectral change (the same as **Fig. 5A**) and HT voltage data during the hydrogel formation and subsequent shrinkage of Z-F<sub>2</sub>-BPS<sub>2</sub> upon the addition of NH<sub>2</sub>OH. *Conditions:* Z-F<sub>2</sub>-BPS<sub>2</sub> (0.10 wt%, 1.2 mM), 50 mM MES-NaOH (pH 5.5) containing DMSO (2.0 vol%), [NH<sub>2</sub>OH] = 40 eq.

■DLS analysis of Z-F<sub>2</sub>-BPS<sub>2</sub>

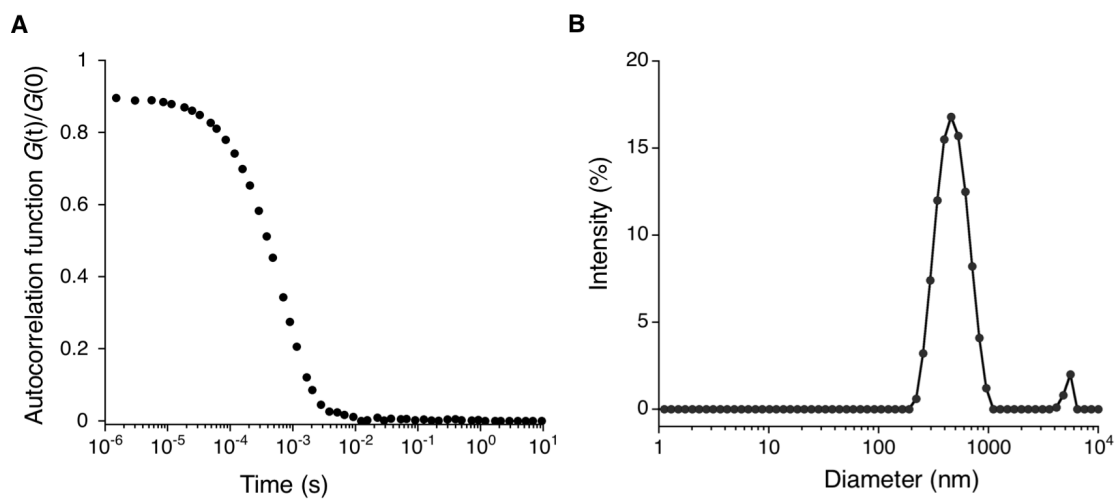

**Fig. S15.** (A) Intensity correlation functions of the aqueous solution of Z-F<sub>2</sub>-BPS<sub>2</sub>. (B) Size distribution of Z-F<sub>2</sub>-BPS<sub>2</sub>. *Conditions:* Z-F<sub>2</sub>-BPS<sub>2</sub> (0.10 wt%, 1.2 mM), 50 mM MES-NaOH (pH 5.5) containing DMSO (2.0 vol%), 25 °C.



## References

- [S1] H. Li and S. Valiyaveetil, Water-soluble multifunctional cross-conjugated poly(*p*-phenylenes) as stimuli-responsive materials: design, synthesis, and characterization, *Macromolecules*, 2007, **40**, 6057–6066.
- [S2] T. Tsuzuki, M. Kabumoto, H. Arakawa and M. Ikeda, Effect of carbohydrate structures on the hydrogelation ability and morphology of self-assembled structures of peptide-carbohydrate conjugates in water, *Org. Biomol. Chem.*, 2017, **15**, 4595–4600.
- [S3] B. Levrant, W. Fieber, J.-M. Lehn and A. Herrmann, Controlled release of volatile aldehydes and ketones from dynamic mixtures generated by reversible hydrazone formation, *Helv. Chim. Acta*, 2007, **90**, 2281–2313.
